# Supplementary material for: 1,5-Diarylbiguanides and their nickel(ii) complexes
Source: Royal Society of Chemistry journal article supplement (doi:10.1039/c2dt32483k), 2012-12-07
Supplement: c2dt32483k.pdf [file c2dt32483k.pdf]

# **1,5-Diarylbiguanides and their Nickel(II) Complexes.**

**David A McMorran\*, C John McAdam, Holly van der Salm and Keith C Gordon**

**Department of Chemistry, University of Otago,**

**PO Box 56, Dunedin, New Zealand**

## **Supplementary Information**

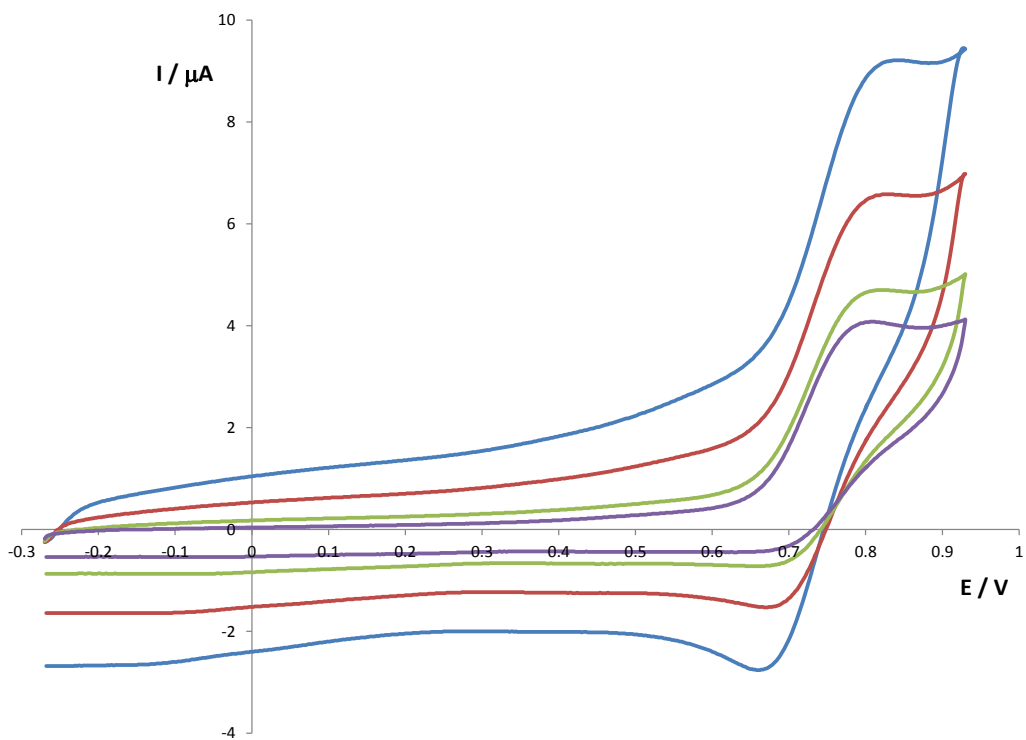

**Fig. S1** Cyclic voltammograms of  $[\text{Ni}(\text{HL1})_2](\text{BF}_4)_2$  at 100, 200, 500 & 1000  $\text{mVs}^{-1}$  ( $\sim 1 \times 10^{-3}$  M in DMF, 0.1 M  $\text{Bu}_4\text{NPF}_6$ , referenced to  $[\text{Fc}^*]^{+/0} = 0.00$  V).

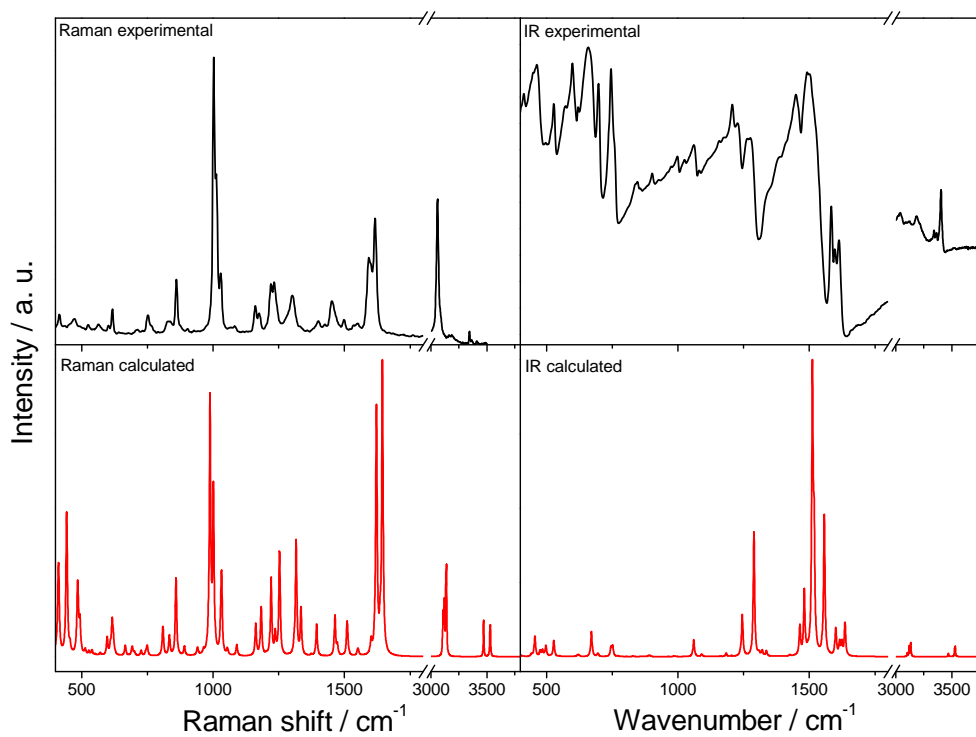

S2. Experimental and calculated Raman and IR spectra for [Ni(L1)<sub>2</sub>]

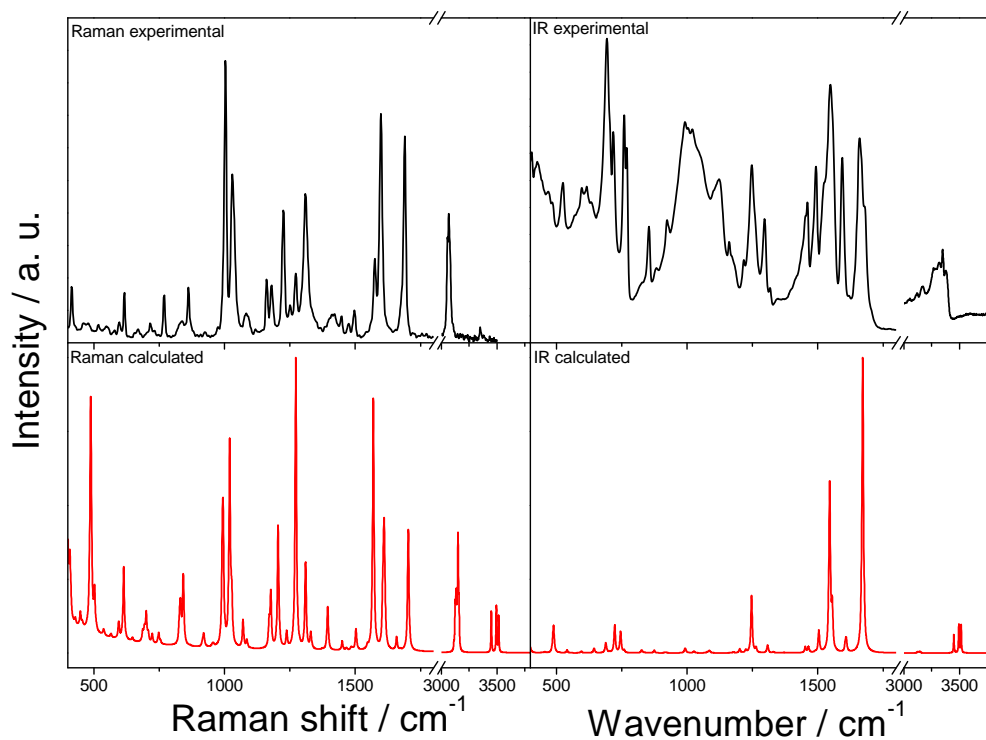

S3. Experimental and calculated Raman and IR spectra for [Ni(HL1)<sub>2</sub>](BF<sub>4</sub>)<sub>2</sub>

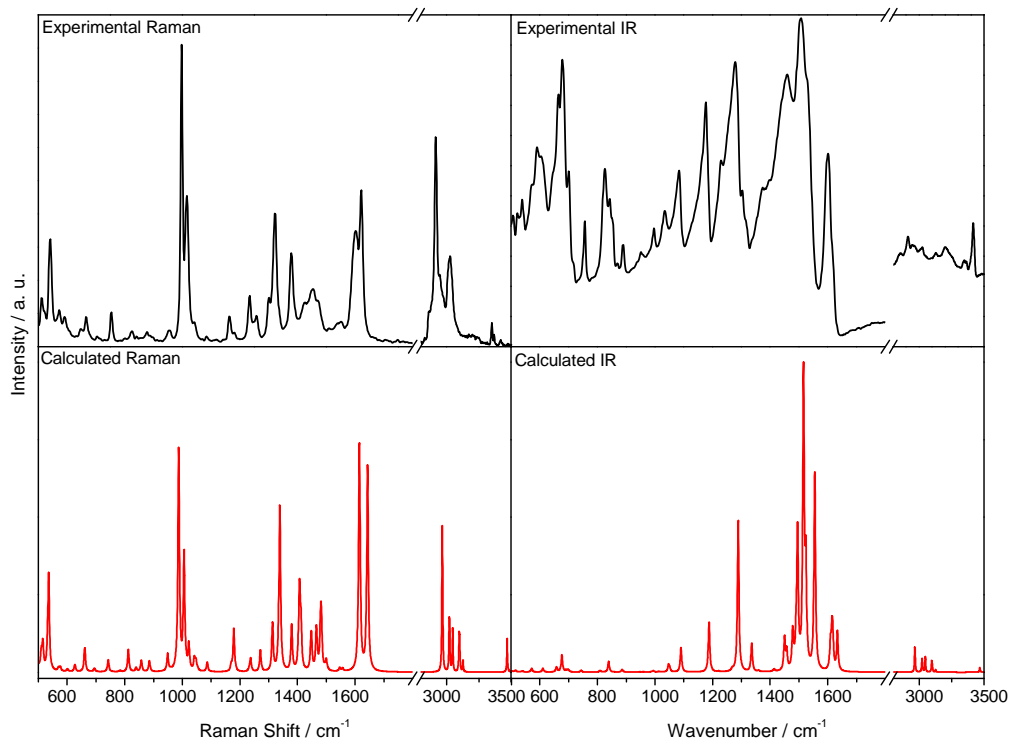

S4. Experimental and calculated Raman and IR spectra for [Ni(L2)<sub>2</sub>]

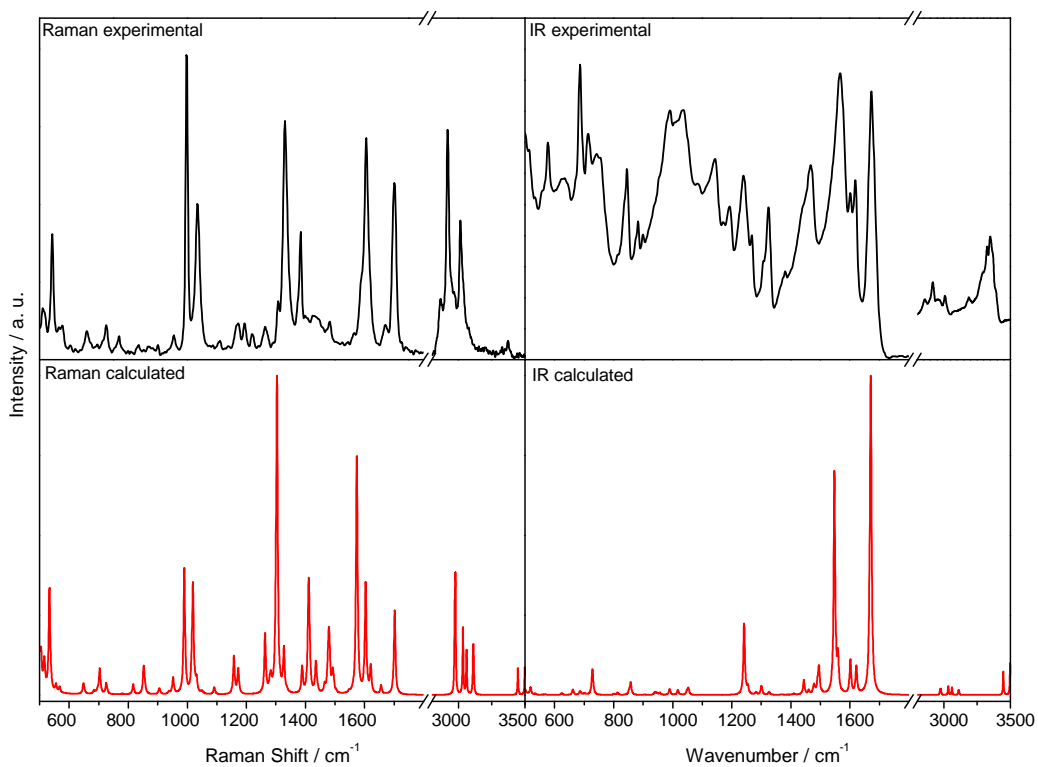

S5. Experimental and calculated Raman and IR spectra for [Ni(HL2)<sub>2</sub>](BF<sub>4</sub>)<sub>2</sub>

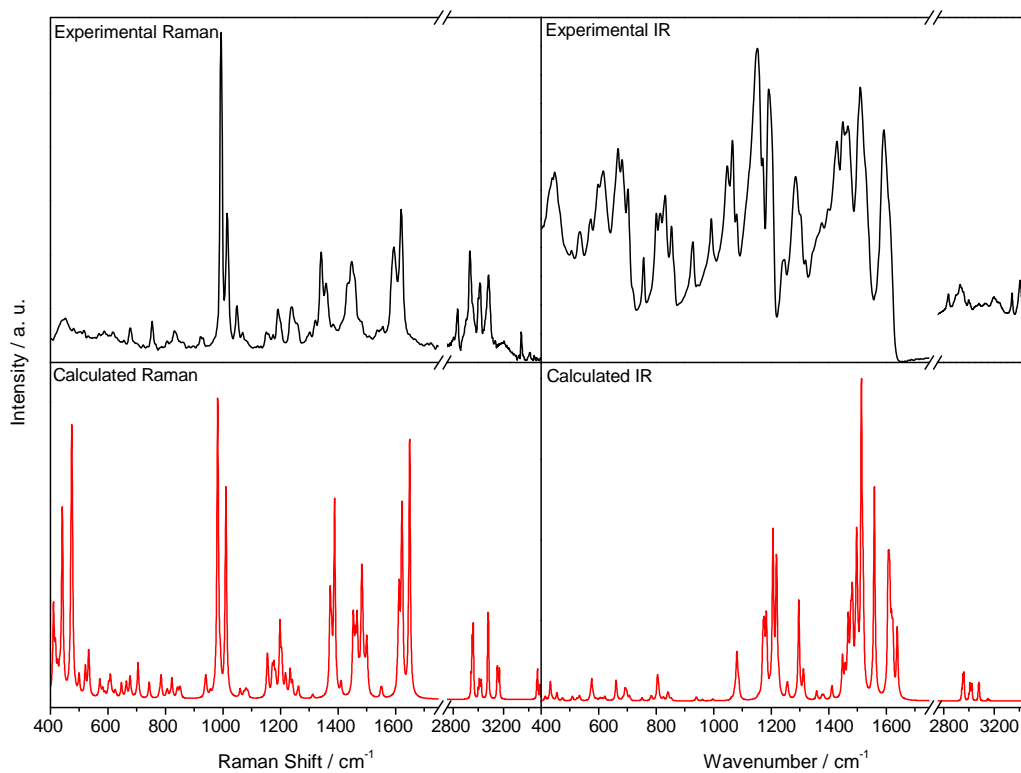

S6. Experimental and calculated Raman and IR spectra for  $[\text{Ni}(\text{L3})_2]$

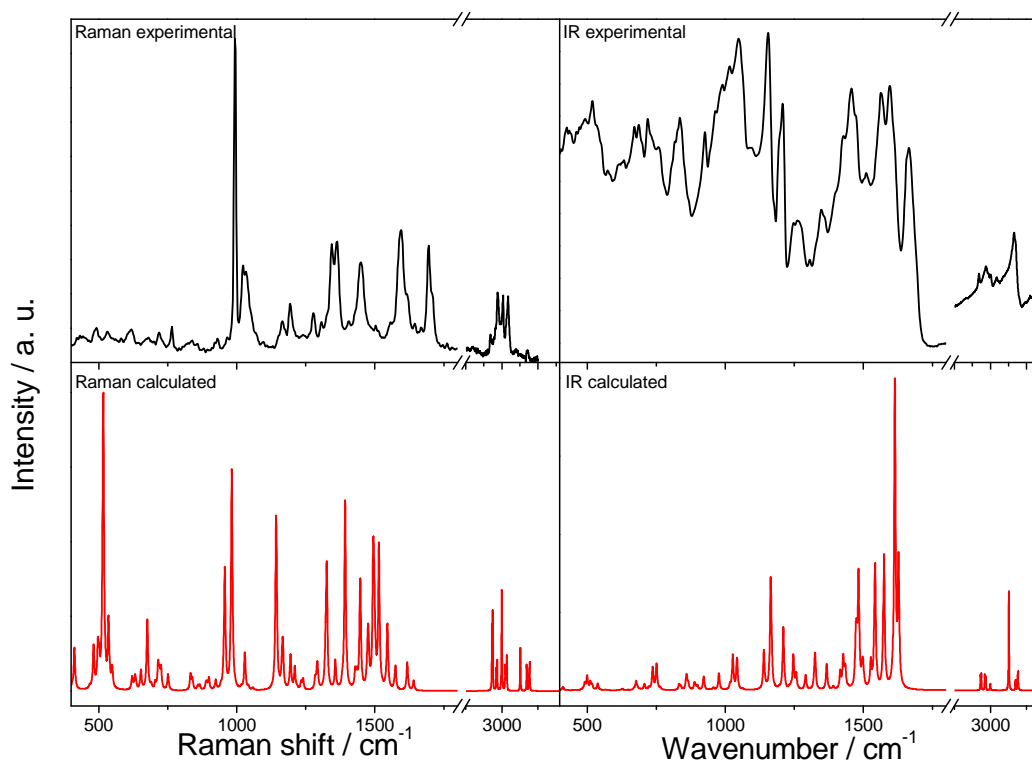

S7. Experimental and calculated Raman and IR spectra for  $[\text{Ni}(\text{HL3})_2](\text{BF}_4)_2$

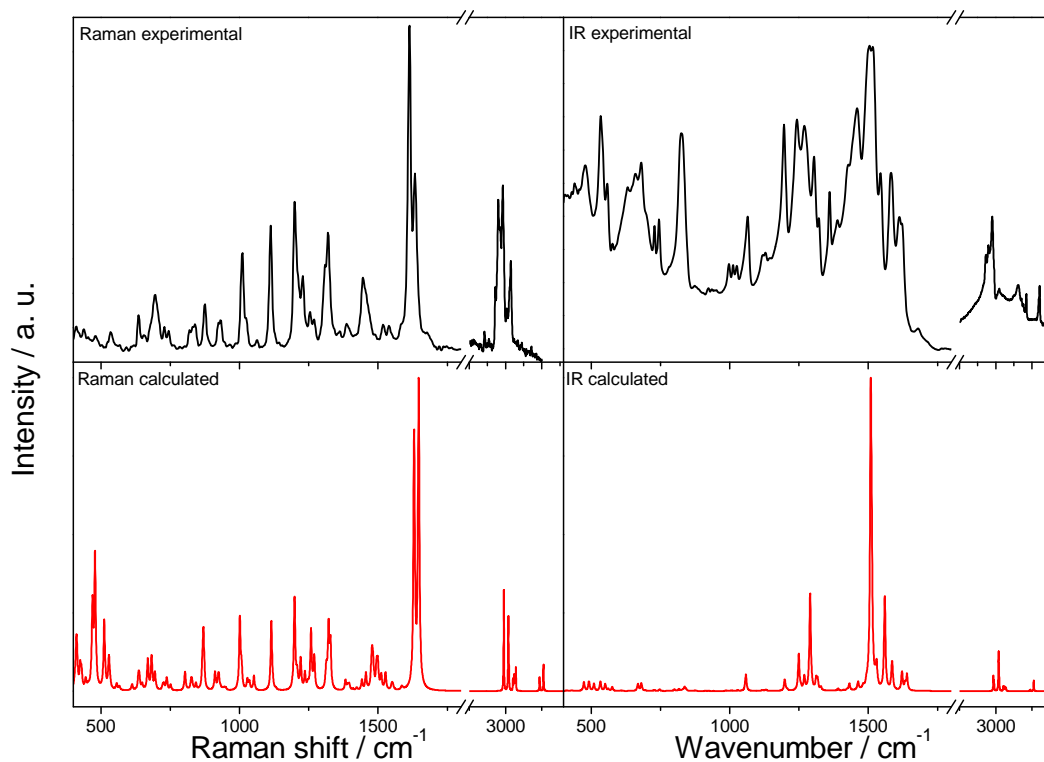

S8. Experimental and calculated Raman and IR spectra for [Ni(L4)<sub>2</sub>]

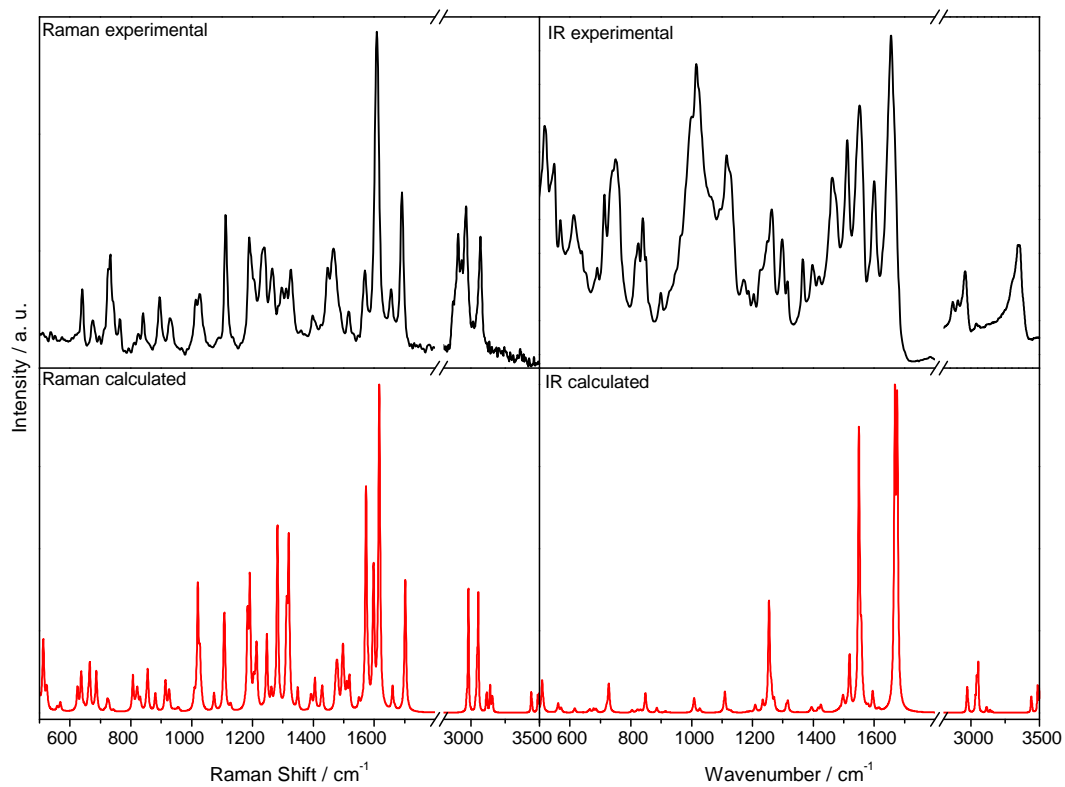

S9. Experimental and calculated Raman and IR spectra for [Ni(HL4)<sub>2</sub>](BF<sub>4</sub>)<sub>2</sub>

Table S1 MADS

| <b>Complex</b>                                                  | <b>MAD / cm<sup>-1</sup></b> |
|-----------------------------------------------------------------|------------------------------|
| [Ni( <b>HL1</b> ) <sub>2</sub> ](BF <sub>4</sub> ) <sub>2</sub> | 11                           |
| [Ni( <b>HL2</b> ) <sub>2</sub> ](BF <sub>4</sub> ) <sub>2</sub> | 10                           |
| [Ni( <b>HL3</b> ) <sub>2</sub> ](BF <sub>4</sub> ) <sub>2</sub> | 12                           |
| [Ni( <b>HL4</b> ) <sub>2</sub> ](BF <sub>4</sub> ) <sub>2</sub> | 10                           |
| [Ni( <b>L1</b> ) <sub>2</sub> ]                                 | 10                           |
| [Ni( <b>L2</b> ) <sub>2</sub> ]                                 | 13                           |
| [Ni( <b>L3</b> ) <sub>2</sub> ]                                 | 13                           |
| [Ni( <b>L4</b> ) <sub>2</sub> ]                                 | 7                            |

Table S2 Calculated single point energy values / hartrees

| <b>Compound</b>                                                 | <b>Energy in vacuo</b> | <b>Energy in water</b> |
|-----------------------------------------------------------------|------------------------|------------------------|
| [Ni( <b>HL1</b> ) <sub>2</sub> ](BF <sub>4</sub> ) <sub>2</sub> | -1801.50994872         | -1801.71113514         |
| [Ni( <b>L1</b> ) <sub>2</sub> ]                                 | -1800.77850250         | -1800.80035065         |
| [Ni( <b>HL2</b> ) <sub>2</sub> ](BF <sub>4</sub> ) <sub>2</sub> | -2116.06332921         | -2116.25513549         |
| [Ni( <b>L2</b> ) <sub>2</sub> ]                                 | -2115.32095201         | -2115.34183996         |
| [Ni( <b>HL3</b> ) <sub>2</sub> ](BF <sub>4</sub> ) <sub>2</sub> | -2717.68516588         | -2717.87428853         |
| [Ni( <b>L3</b> ) <sub>2</sub> ]                                 | -2716.94718770         | -2716.98144196         |
| [Ni( <b>HL4</b> ) <sub>2</sub> ](BF <sub>4</sub> ) <sub>2</sub> | -2430.52644673         | -2430.71614991         |
| [Ni( <b>L4</b> ) <sub>2</sub> ]                                 | -2429.78664136         | -2429.80854907         |

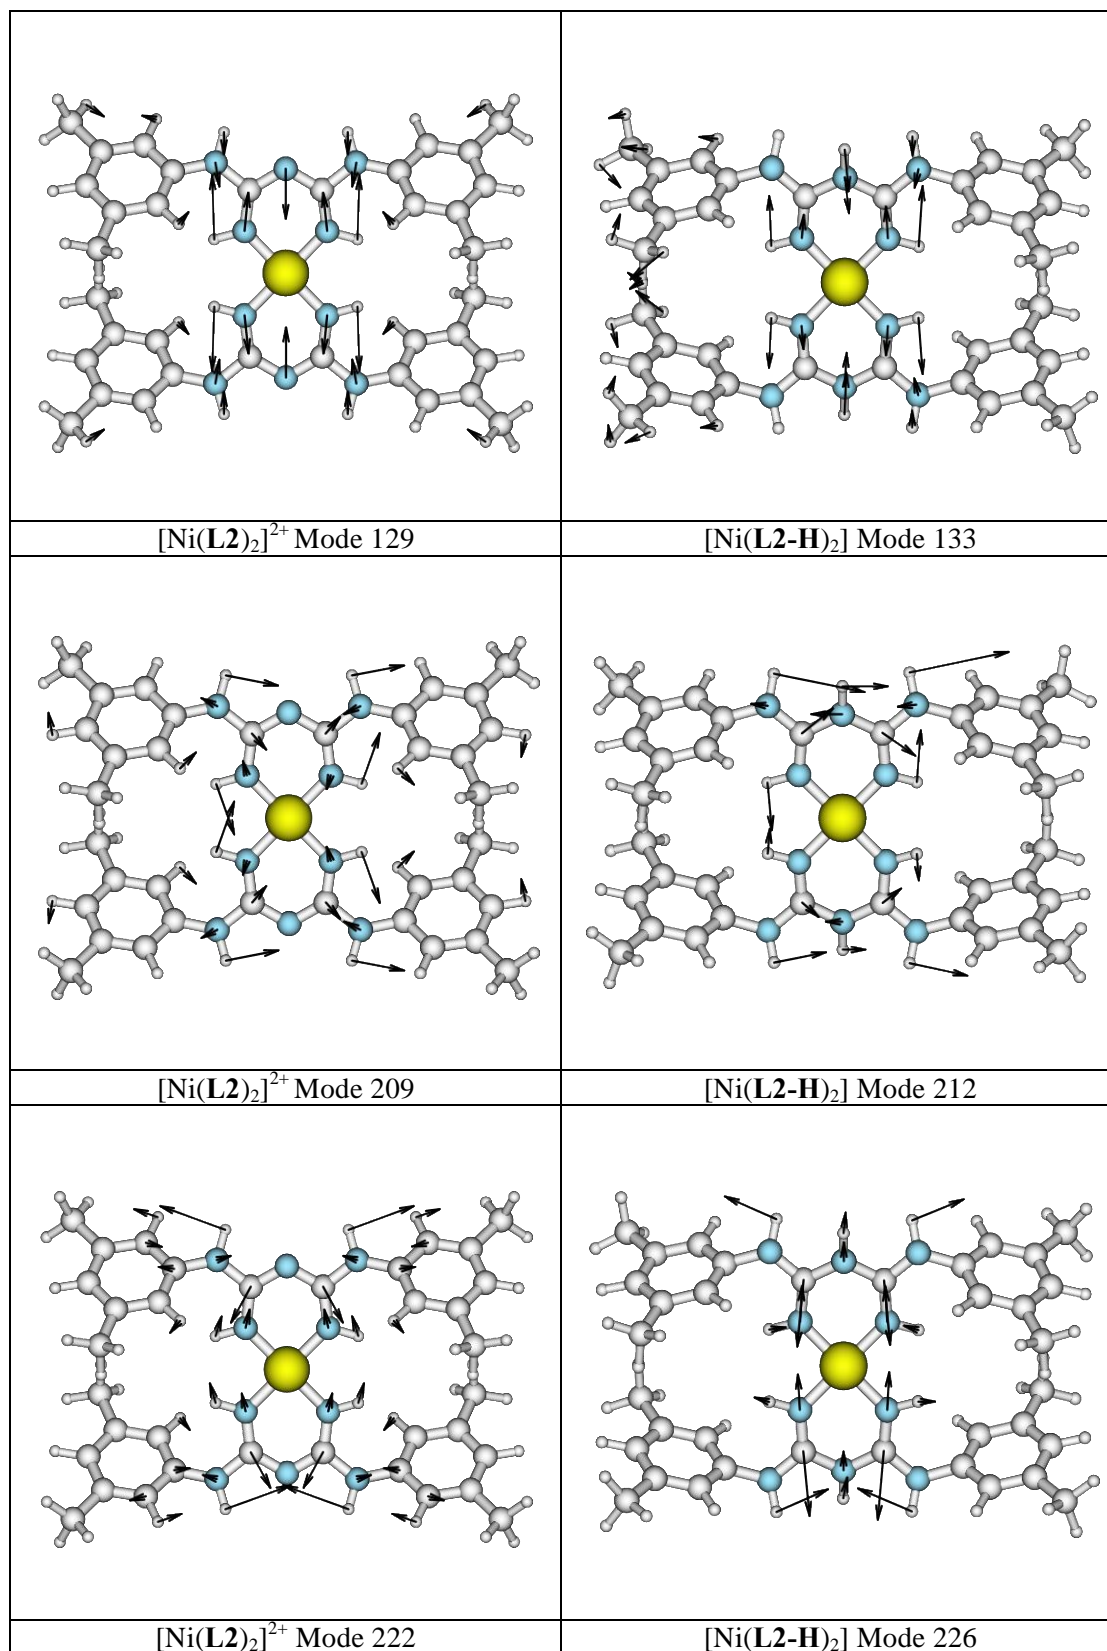

Figure S10 Selected corresponding vibrational modes for [Ni(HL2)<sub>2</sub>]<sup>2+</sup> and [Ni(L2)<sub>2</sub>].



Table S3: Predicted transitions assigned to the relevant absorption band.

| Compound                                          | Wavelength / nm | Major MO configuration (%)                     |
|---------------------------------------------------|-----------------|------------------------------------------------|
| [Ni( <b>HL1</b> )](BF <sub>4</sub> ) <sub>2</sub> | 579             | H-9→LUMO (76), H-8→LUMO (20)                   |
|                                                   | 569             | H-9→LUMO (23), H-8→LUMO (48)                   |
|                                                   | 533             | H-15→LUMO (19), H-10→LUMO (53), HOMO→LUMO (19) |
| [Ni( <b>L1</b> )]                                 | 575             | H-14→LUMO (14), HOMO→LUMO (70)                 |
|                                                   | 536             | H-5→LUMO (51), H-4→LUMO (36)                   |
|                                                   | 502             | H-7→LUMO (25), H-1→LUMO (57)                   |
| [Ni( <b>HL2</b> )](BF <sub>4</sub> ) <sub>2</sub> | 581             | H-10→LUMO (72), H-8→LUMO (23)                  |
|                                                   | 572             | H-10→LUMO (28), H-8→LUMO (51)                  |
|                                                   | 538             | H-14→LUMO (18), H-9→LUMO (54)                  |
| [Ni( <b>L2</b> )]                                 | 569             | HOMO→LUMO (70), HOMO→L+6 (10)                  |
|                                                   | 532             | H-5→LUMO (87), H-5→L+6 (13)                    |
|                                                   | 498             | H-8→LUMO (18), H-1→LUMO (55)                   |
| [Ni( <b>HL3</b> )](BF <sub>4</sub> ) <sub>2</sub> | 641             | H-10→LUMO (85), H-8→LUMO (12)                  |
|                                                   | 635             | H-32→LUMO (10), H-10→LUMO (16), H-8→LUMO (61)  |
|                                                   | 585             | H-31→LUMO (13), H-14→LUMO (13), H-9→LUMO (62)  |
| [Ni( <b>L3</b> )]                                 | 566             | HOMO→LUMO (69)                                 |
|                                                   | 528             | H-5→LUMO (82)                                  |
|                                                   | 492             | H-10→LUMO (23), H-1→LUMO (51)                  |
| [Ni( <b>HL4</b> )](BF <sub>4</sub> ) <sub>2</sub> | 699             | H-8→LUMO (43), H-4→LUMO (27)                   |
|                                                   | 649             | H-9→LUMO (100)                                 |
|                                                   | 635             | H-10→LUMO (59), HOMO→LUMO (14)                 |
| [Ni( <b>L4</b> )]                                 | 575             | H-12→LUMO (14), HOMO→LUMO (71)                 |
|                                                   | 539             | H-5→LUMO (89), H-5→L+6 (10)                    |
|                                                   | 504             | H-7→LUMO (30), H-1→LUMO (51)                   |

$[\text{Ni}(\text{L3})_2](\text{BF}_4)_2$

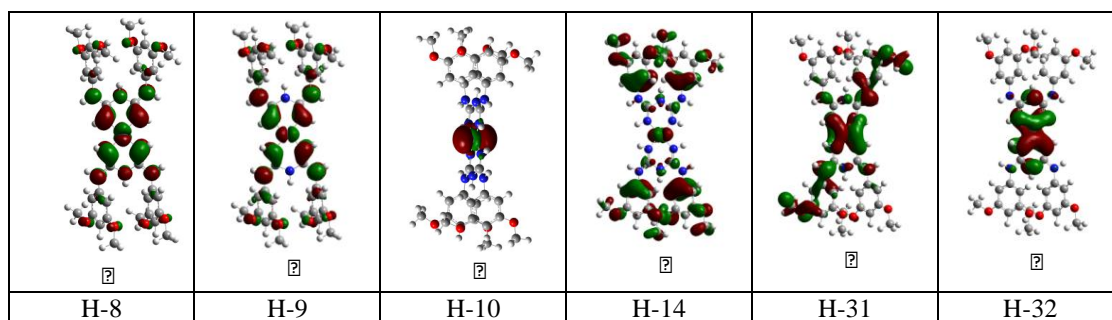

$[\text{Ni}(\text{L3-H})_2]$

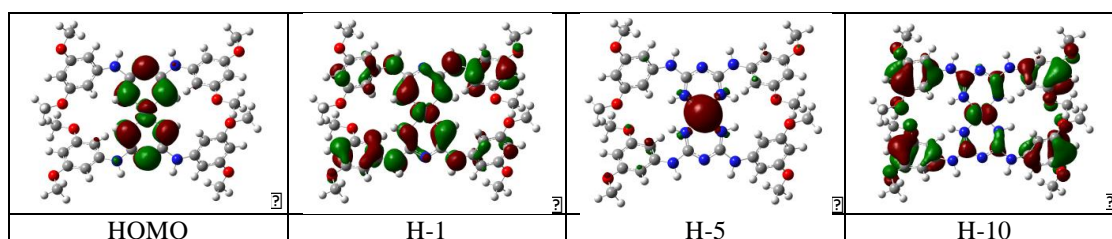

$[\text{Ni}(\text{L4})_2](\text{BF}_4)_2$

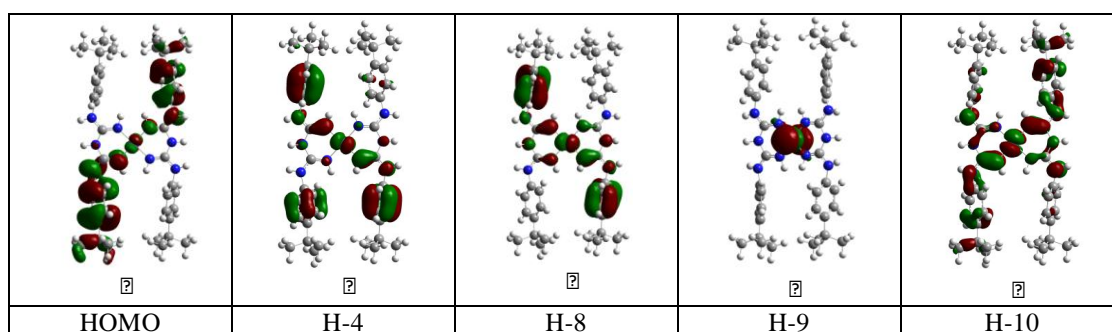

$[\text{Ni}(\text{L4-H})_2]$

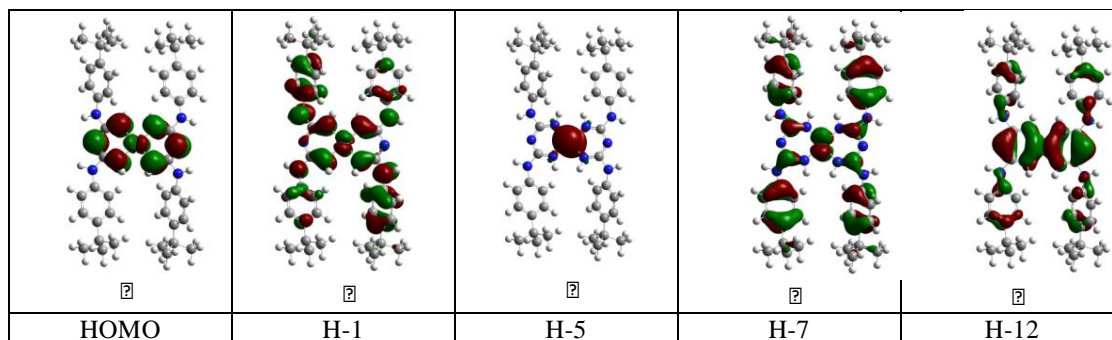

?

Figure S11 Molecular orbitals involved in predicted electronic transitions for  $[\text{Ni}(\text{HL1})_2](\text{BF}_4)_2$ ,  $[\text{Ni}(\text{L1})_2]$ ,  $[\text{Ni}(\text{HL2})_2](\text{BF}_4)_2$  and  $[\text{Ni}(\text{L2})_2]$ .

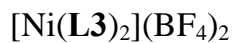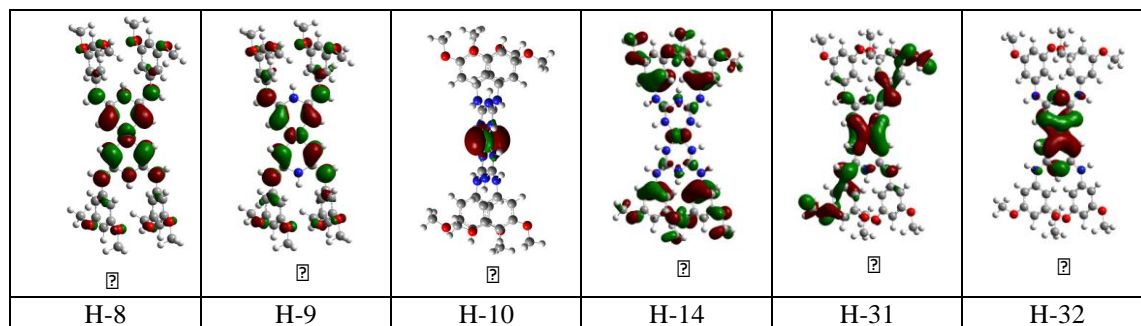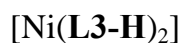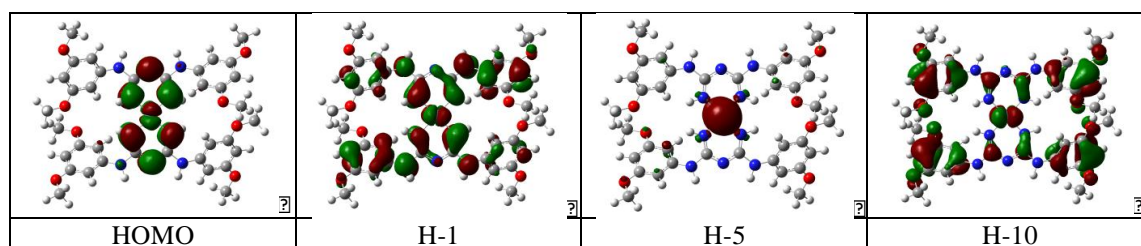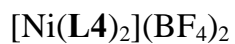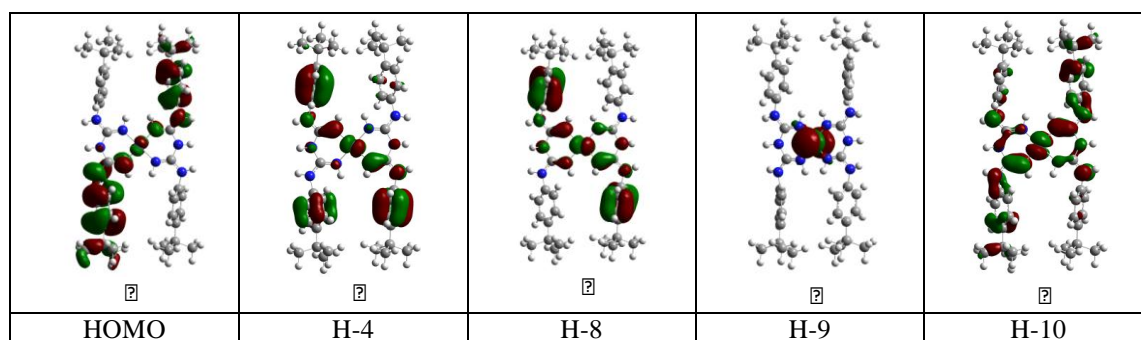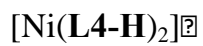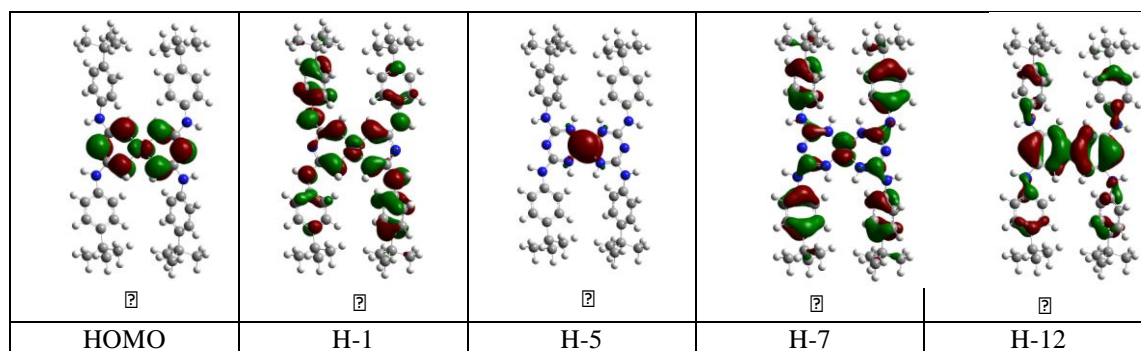

?

Figure S12 Molecular orbitals involved in predicted electronic transitions for  $[\text{Ni}(\text{HL3})_2](\text{BF}_4)_2$ ,  $[\text{Ni}(\text{L3})_2]$ ,  $[\text{Ni}(\text{HL4})_2](\text{BF}_4)_2$  and  $[\text{Ni}(\text{L4})_2]$ .
